# Supplementary material for: Identification and analysis of unitary pseudogenes: historic and contemporary gene losses in humans and other primates
Source: Springer Nature journal article supplement (doi:10.1186/gb-2010-11-3-r26), 2010-03-08

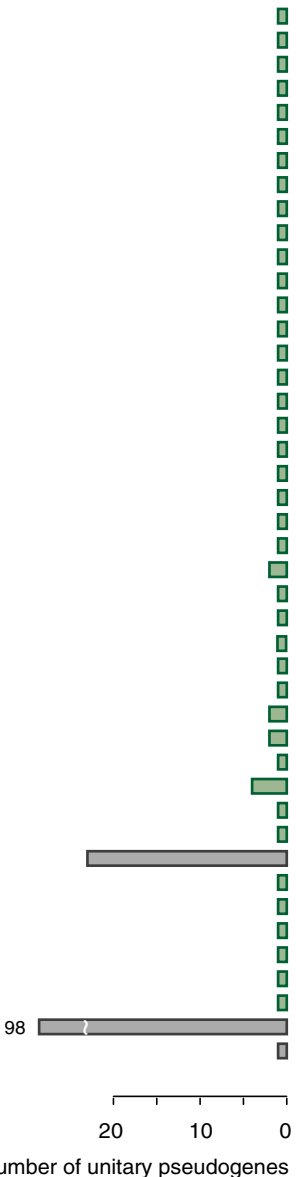

ACYL  
AYTL  
DESC  
FETA  
SIRPB  
GULO  
MUP  
NEPN  
NRADD  
THA  
UOX  
CTF  
CYC  
MBL  
TCAM  
CALR  
CETN  
DOC  
ART  
AOX  
HYAL  
ACNAT  
TSSK  
TAAR  
TRPC  
GUCY  
SEC  
TLR  
SULT  
TEX  
TMPRSS  
PTPR  
ADAM  
PCDHG  
PRAME  
VN  
TAS  
ABC  
NR  
CYP  
HIST  
SLC  
OR  
ZNF

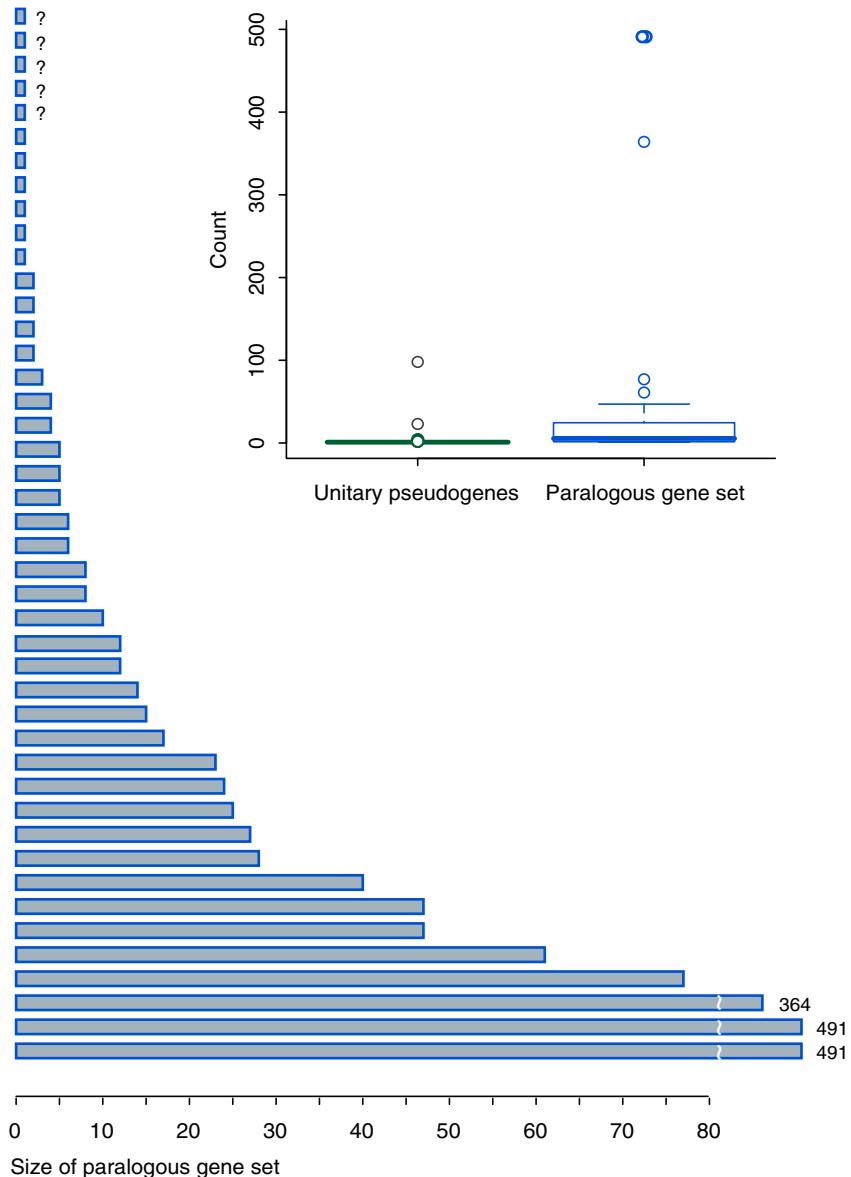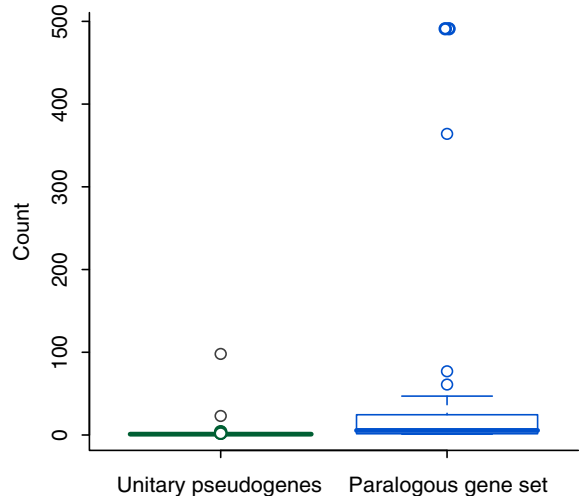

Supplement: 13059_2009_2319_MOESM3_ESM.pdf [file 13059_2009_2319_MOESM3_ESM.pdf]
