# Supplementary material for: Identification and analysis of unitary pseudogenes: historic and contemporary gene losses in humans and other primates
Source: Springer Nature journal article supplement (doi:10.1186/gb-2010-11-3-r26), 2010-03-08
Supplement: 13059_2009_2319_MOESM4_ESM.pdf [file 13059_2009_2319_MOESM4_ESM.pdf]

ψMUP

Human chr9-

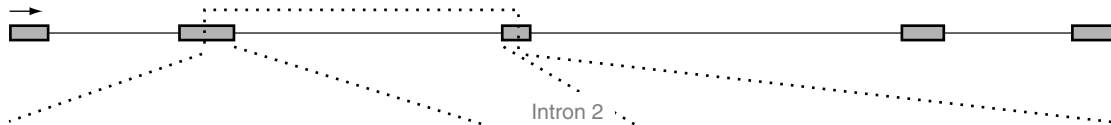

|             |                                   |                        |
|-------------|-----------------------------------|------------------------|
| Human       | FVKHIDYLGNSSLTFKLEI [at[at...agt] | ENGNCTEINLACKPTEKNAI   |
| Chimp       | FVKHTDNLGNSLTFKLEI                | ENGNCTEINLTCKPTEKNAI   |
| Gorilla     | FVKHIDYLGNSLTFKLEI                | ENGNCTEINLACKPTEK---   |
| Orangutan   | FVKHIDYLRNSSLTFKLEI               | ENGNCTEINLACKPTEKNAI   |
| Rhesus      | FVEHIDYLGDNSSLTFKLEI              | ENGTCTEINLACKPTEKNAI   |
| Marmoset    | FVEHIGYQGESSLTFKLEI               | EN GKCTEINLACKPTEKNAI  |
| Tarsier     | FMEHIDFLDNSSL S FKFH KI           | KNGECTEMYLVCDQTE----   |
| Mouse lemur | FVERIYVLEHSSLYFKLHTI              | VNGECSEVPFVCDSTGKDGE   |
| Bushbaby    | FVEQIQALKNSSLYFKYHTL              | ENGECEISFVCDQTEKDGE    |
| Mouse       | FVEHIHVLEN-SLAFKFHTV              | IDGECSEIFLVADKTEKAGE   |
| Rat         | FVQHIDVLEN-SLGFTFRIK              | ENGVCTEFSLVADKTAKDGE   |
| Guinea Pig  | FVESIEPVEDSALSFKFWAH              | ENGECKQISLICNRVAE-GV   |
| Squirrel    | FVEYIHALKNSSSLGKFI I              | IKRECTEIFLVS NKTEKDG V |
| Rabbit      | FVEYIHVWKNSSLSFKFHTP              | VNGKCTELFLTCDPTEDNHV   |
| Pika        | FVKQVDILKNSSLSYIYHI I             | ENGQCAAHELVCDPTEEEGE   |
| Alpaca      | FLEHIHAFDNSSLSLKFHTK              | VNGECIEISLICVKAEDGV    |
| Dolphin     | FVEHVHALENFSLFFKFHTK              | VSGACTEMSLSDKAGEDGV    |
| Cow         | FVEYIDVLENSLLLFKFHTK              | VNGVCTELSLVSDSTGEDGV   |
| Horse       | FVENIQPLDNSSLYFKFQRK              | GNEECSGFSLVADKTEEDA I  |
| Cat         | FVKHIKALDNSSLSFVFHTK              | EN GKCTEIFLVADKT-KDGV  |
| Dog         | FVKDIEVLSNSSLIFTMHTK              | VNGKCTKISLICNKTEKDGE   |
| Microbat    | FVESIQVLDNSSLSFKFHMK              | VNGECTEISFICDKTEEKGV   |
| Megabat     | FREYMKLLDNSSLSFTFFVK              | ANGECIEGSLVCDKTEKDGE   |
| Armadillo   | FLESIHVLPNSSLFFFEFLIK             | TNGECISINFTCDKTEVQDE   |
