# Supplementary material for: Identification and analysis of unitary pseudogenes: historic and contemporary gene losses in humans and other primates
Source: Springer Nature journal article supplement (doi:10.1186/gb-2010-11-3-r26), 2010-03-08
Supplement: 13059_2009_2319_MOESM5_ESM.pdf [file 13059_2009_2319_MOESM5_ESM.pdf]

**(a)**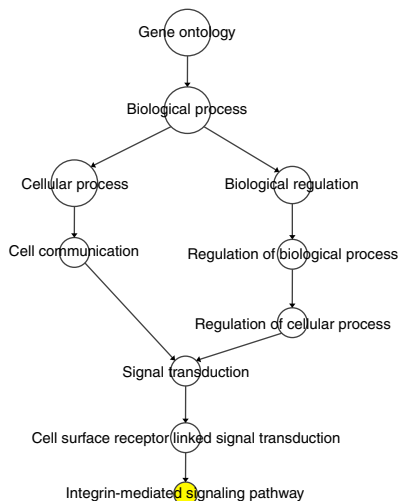**(b)**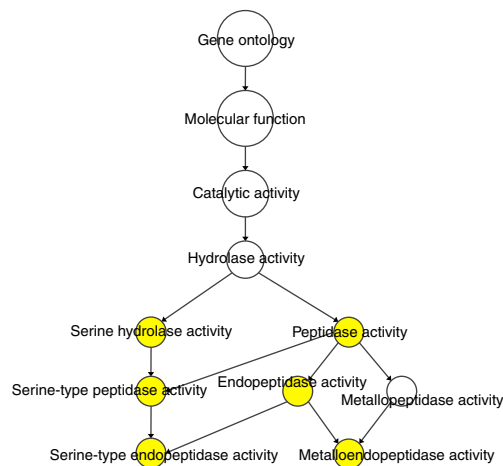**(c)**

| Term ID             | Term                                          | Original <i>P</i> -value | Corrected <i>P</i> -value |
|---------------------|-----------------------------------------------|--------------------------|---------------------------|
| Biological process: |                                               |                          |                           |
| GO:7229             | Integrin-mediated signaling pathway           | $3.63 \times 10^{-05}$   | $1.03 \times 10^{-02}$    |
| Molecular function: |                                               |                          |                           |
| GO:0016809          | Endopeptidase activity                        | $2.97 \times 10^{-05}$   | $5.94 \times 10^{-03}$    |
| GO:0004222          | Metalloendopeptidase activity                 | $6.74 \times 10^{-04}$   | $4.14 \times 10^{-02}$    |
| GO:0008233          | Peptidase activity                            | $7.61 \times 10^{-04}$   | $4.14 \times 10^{-02}$    |
| GO:0004252          | Serine-type endopeptidase activity            | $8.27 \times 10^{-04}$   | $4.14 \times 10^{-02}$    |
| GO:0008236          | Serine-type peptidase activity                | $1.45 \times 10^{-03}$   | $4.93 \times 10^{-02}$    |
| GO:0017171          | Serine hydrolase activity                     | $1.48 \times 10^{-03}$   | $4.93 \times 10^{-02}$    |
| Pfam:               |                                               |                          |                           |
| PF01562             | Reprolysin family propeptide                  | $1.78 \times 10^{-05}$   | $4.24 \times 10^{-04}$    |
| PF01421             | Reprolysin (M12B) family zinc metalloprotease | $2.15 \times 10^{-05}$   | $4.24 \times 10^{-04}$    |
