# Supplementary material for: Identification and analysis of unitary pseudogenes: historic and contemporary gene losses in humans and other primates
Source: Springer Nature journal article supplement (doi:10.1186/gb-2010-11-3-r26), 2010-03-08
Supplement: 13059_2009_2319_MOESM8_ESM.pdf [file 13059_2009_2319_MOESM8_ESM.pdf]

**(a)**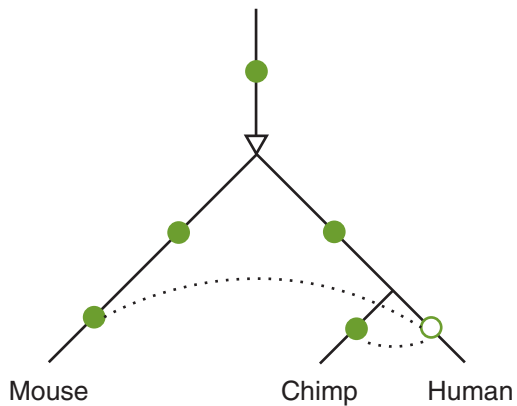**(b)**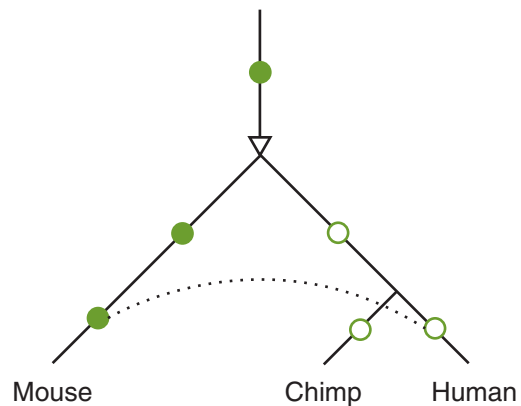**(c)**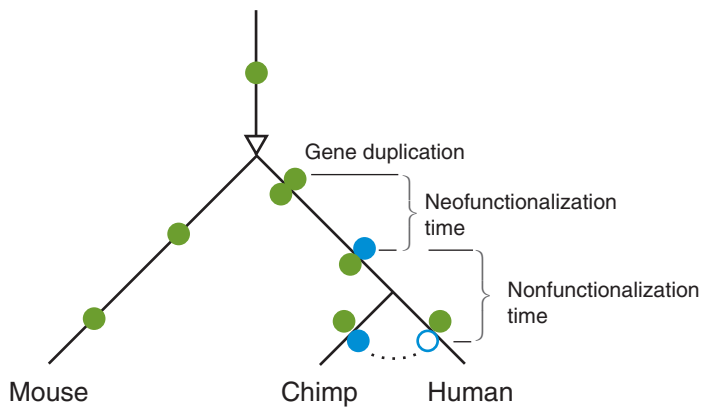

- ▽ Last common ancestor of eumarchontoglires
- ..... Unitary pseudogene relativity
- ● Functional gene
- ○ Pseudogene
