# Supplementary material for: Identification and analysis of unitary pseudogenes: historic and contemporary gene losses in humans and other primates
Source: Springer Nature journal article supplement (doi:10.1186/gb-2010-11-3-r26), 2010-03-08
Supplement: 13059_2009_2319_MOESM9_ESM.pdf [file 13059_2009_2319_MOESM9_ESM.pdf]

**(a)**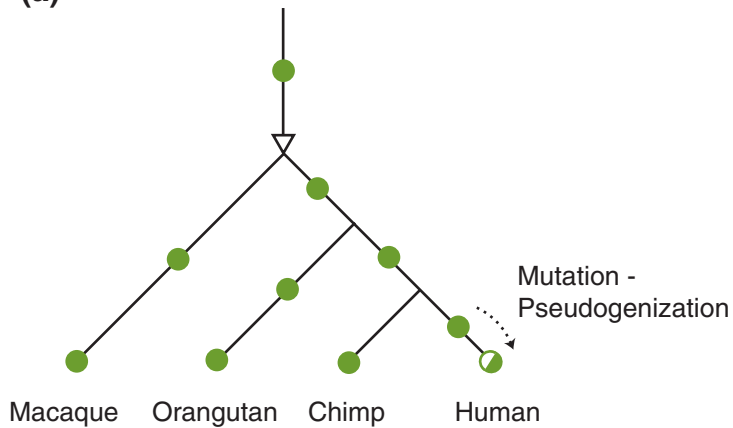**(b)**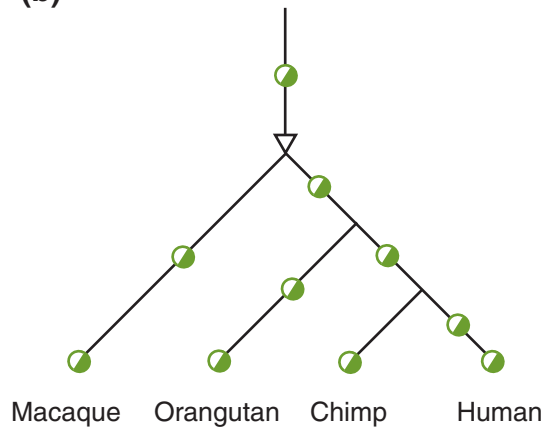**(c)**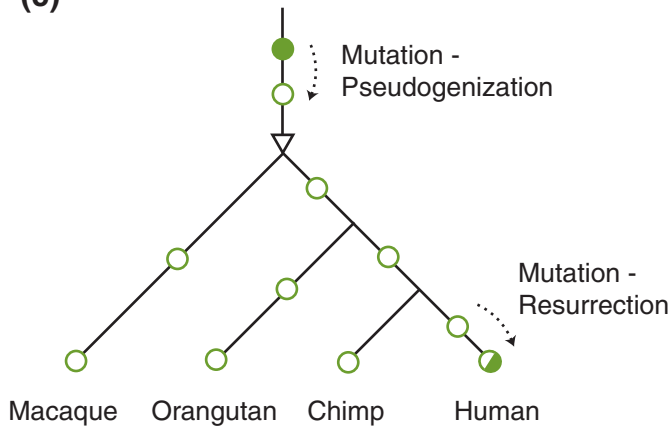

- ▽ Last common ancestor
- Functional gene
- Pseudogene
- ◐ Polymorphism with functional and pseudogenic gene alleles
