# Supplementary figures and images for: Identification and analysis of unitary pseudogenes: historic and contemporary gene losses in humans and other primates
Source: Springer Nature journal article supplement (doi:10.1186/gb-2010-11-3-r26), 2010-03-08

(a)

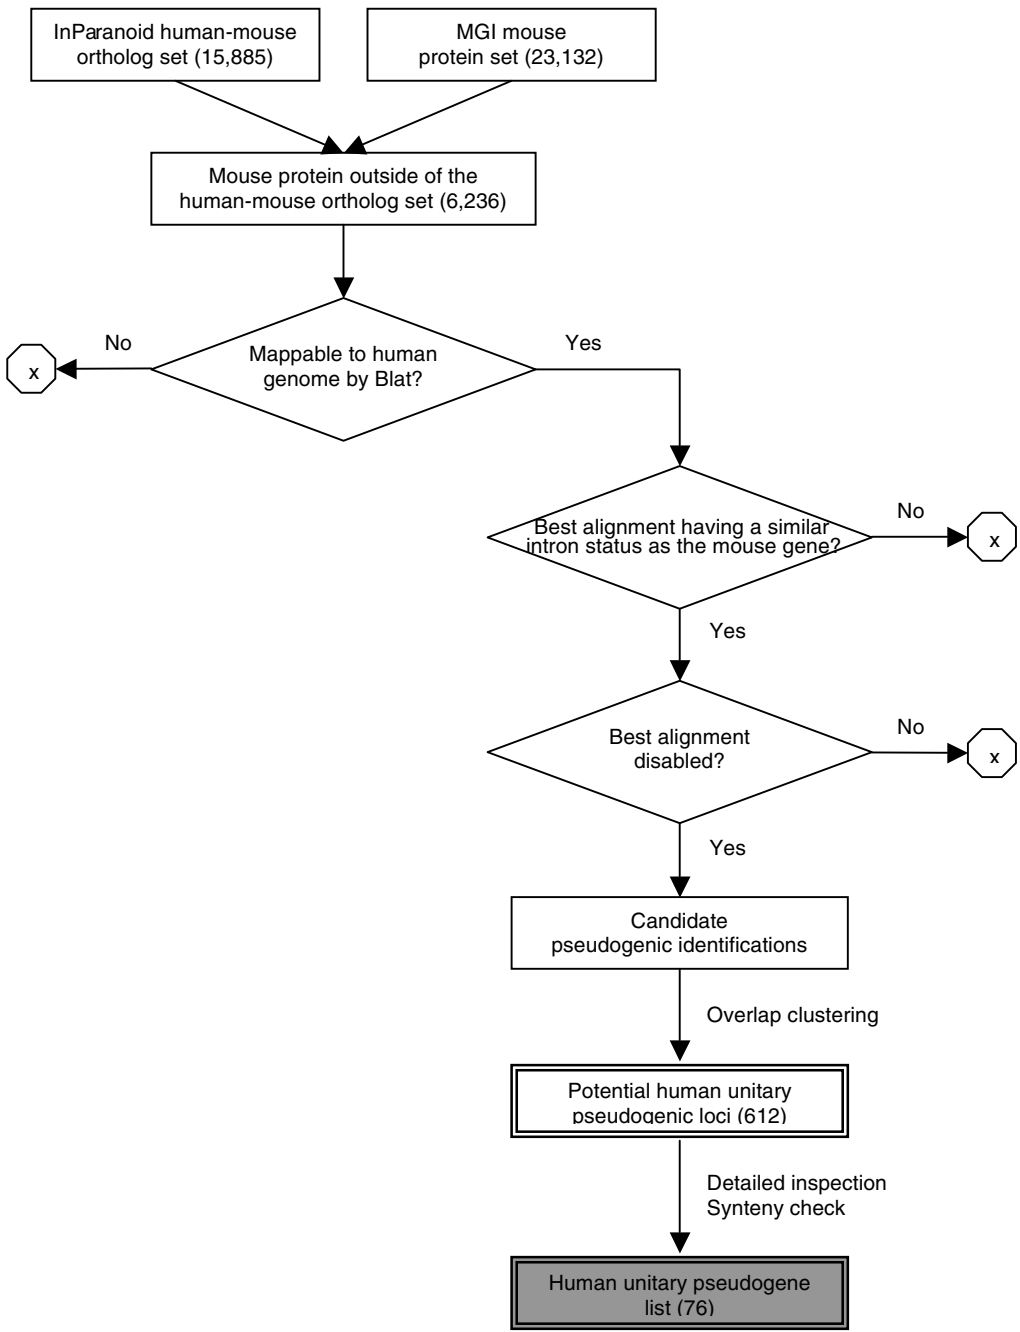

(b)

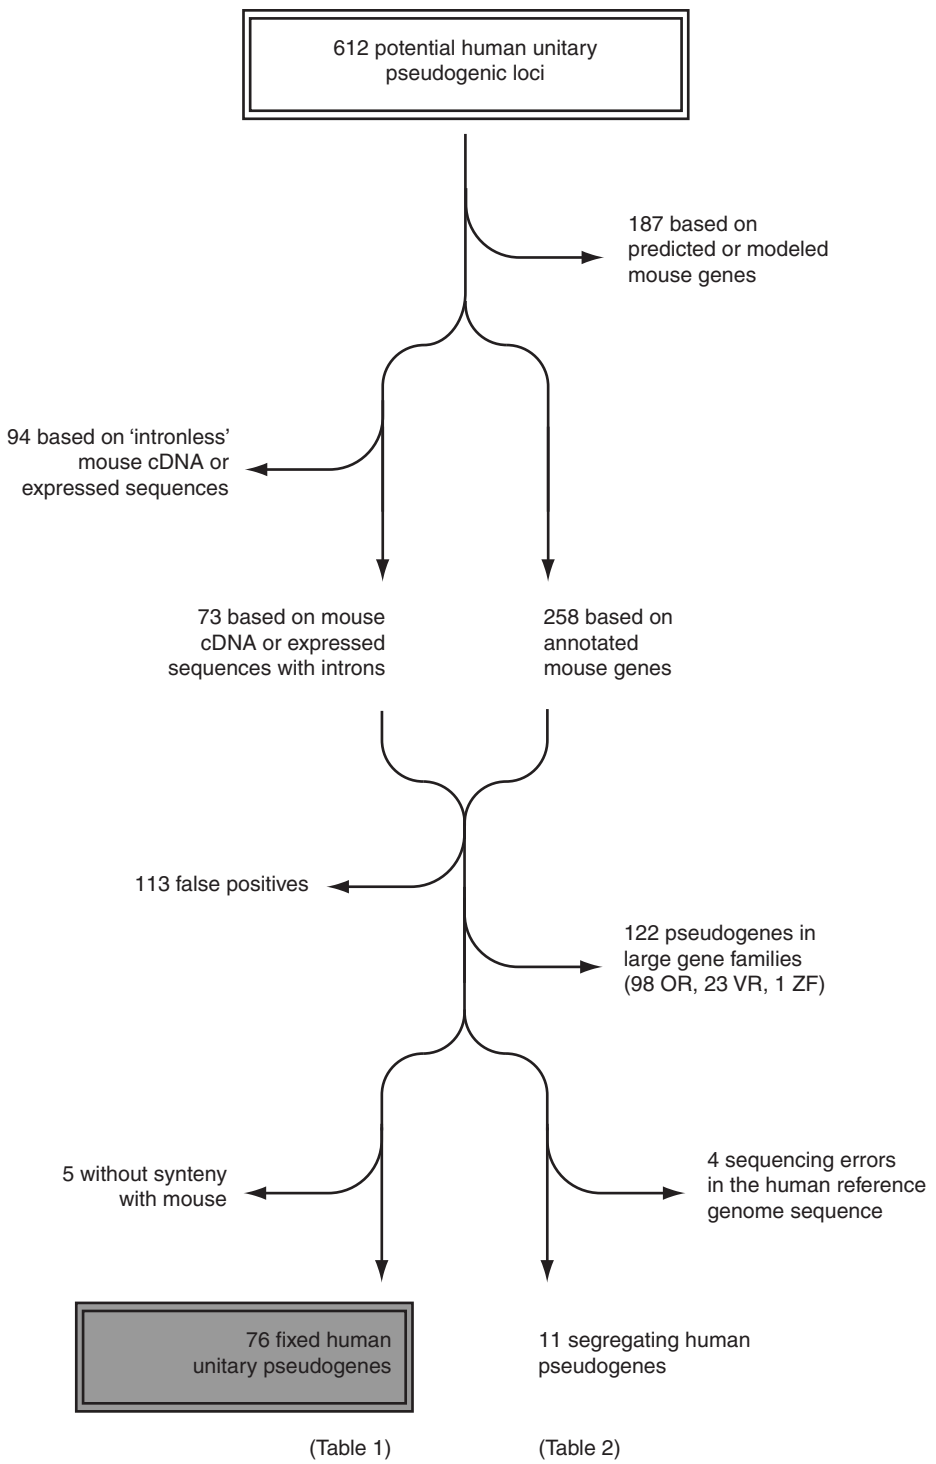

Supplement: 13059_2009_2319_MOESM2_ESM.pdf [file 13059_2009_2319_MOESM2_ESM.pdf]

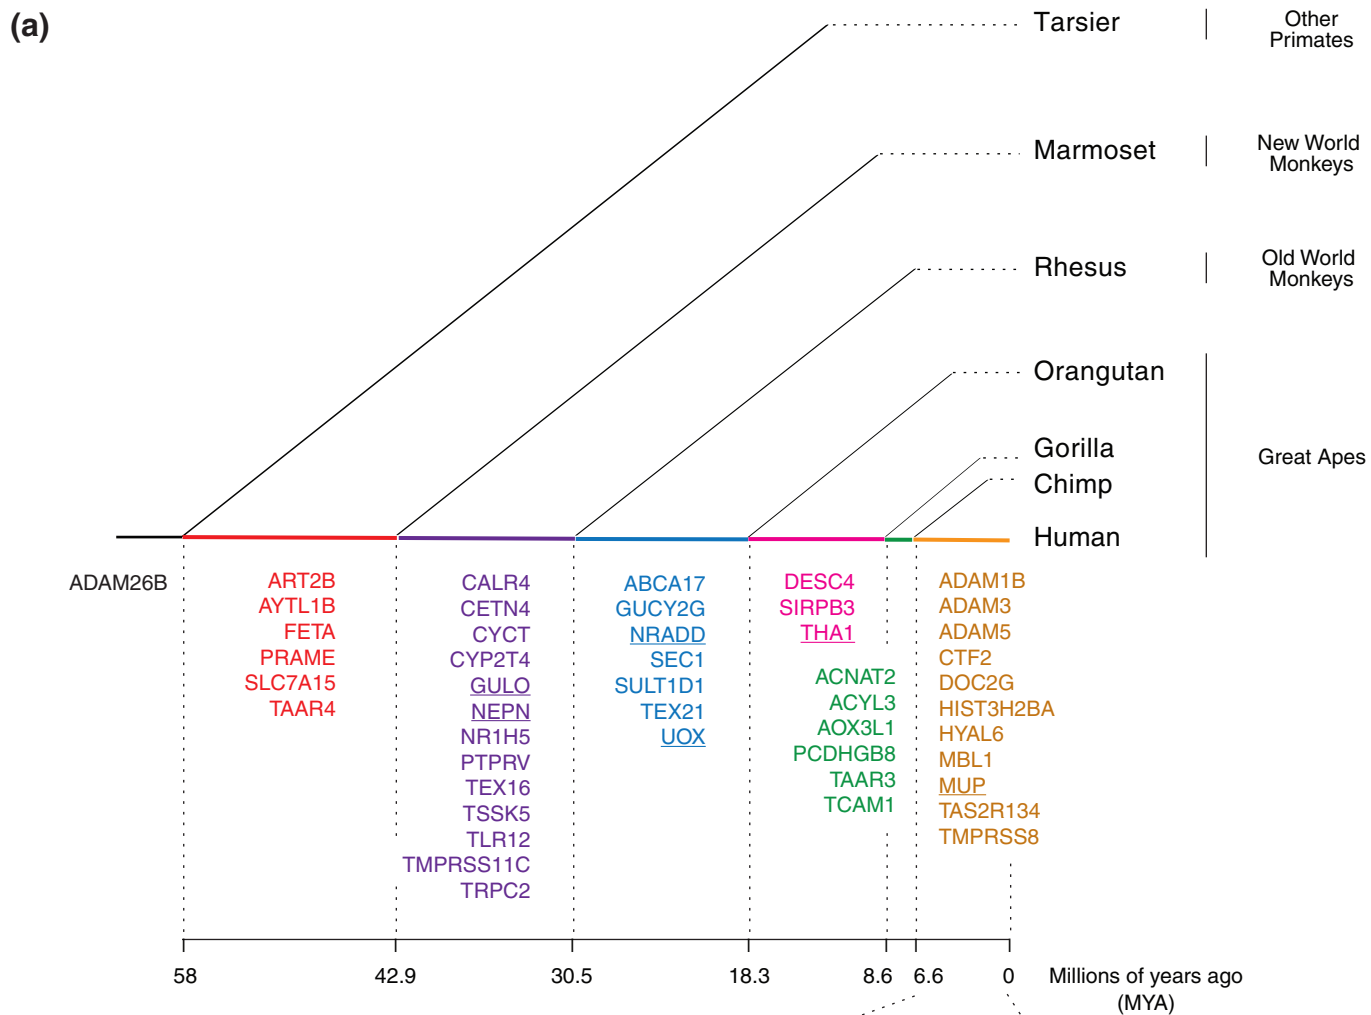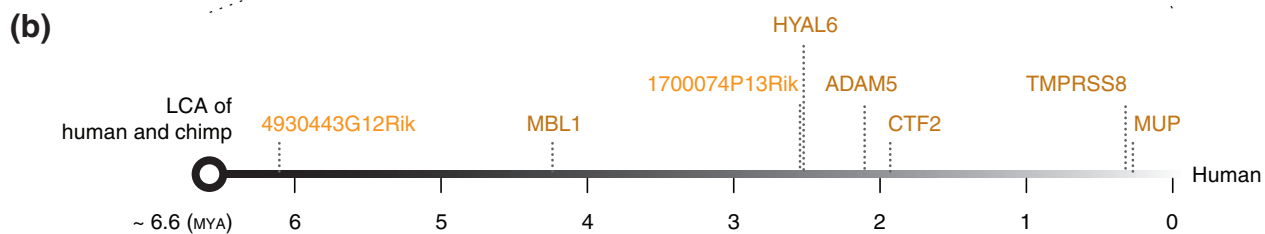

Supplement: 13059_2009_2319_MOESM6_ESM.pdf [file 13059_2009_2319_MOESM6_ESM.pdf]

(a)

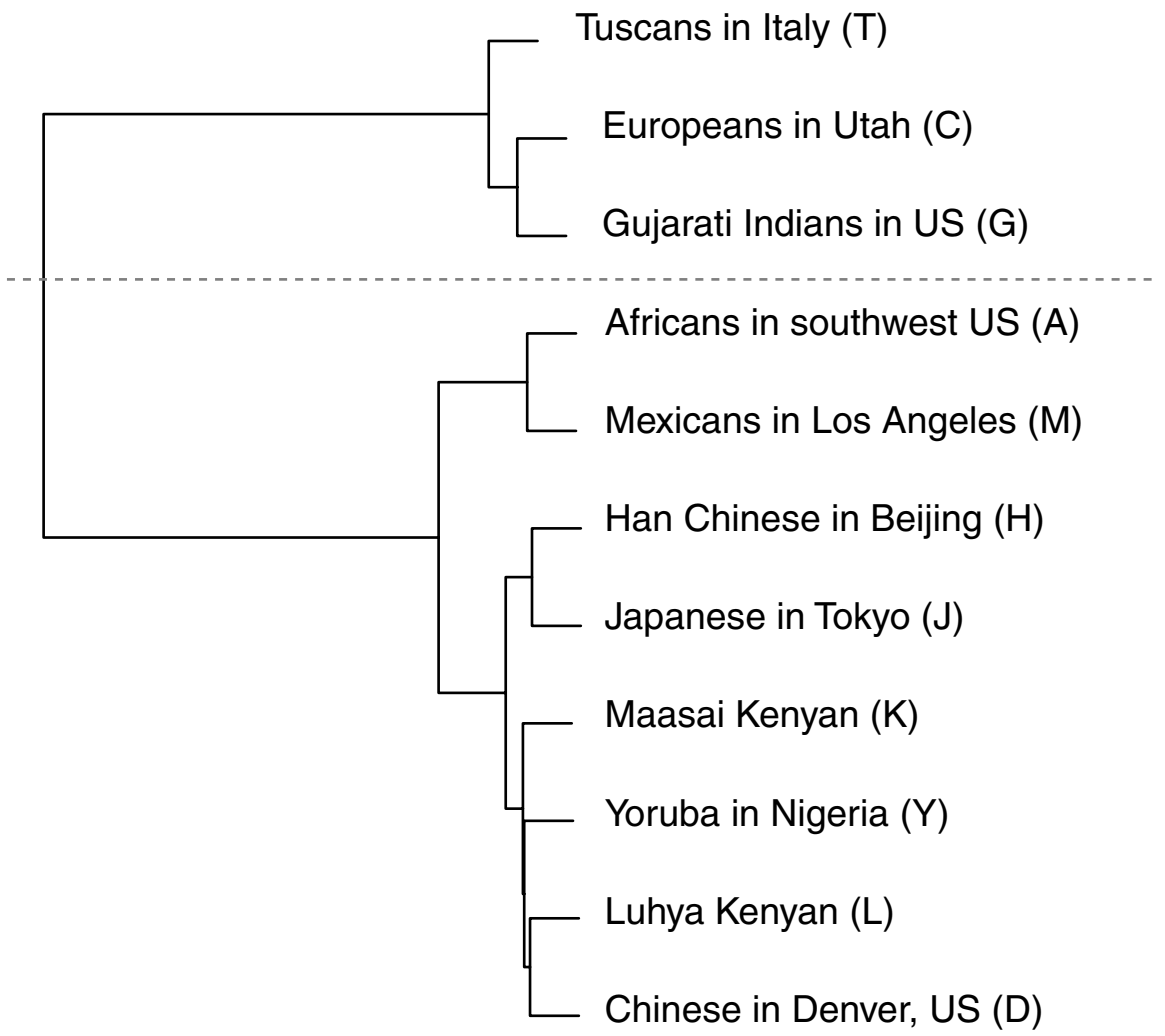

(b)

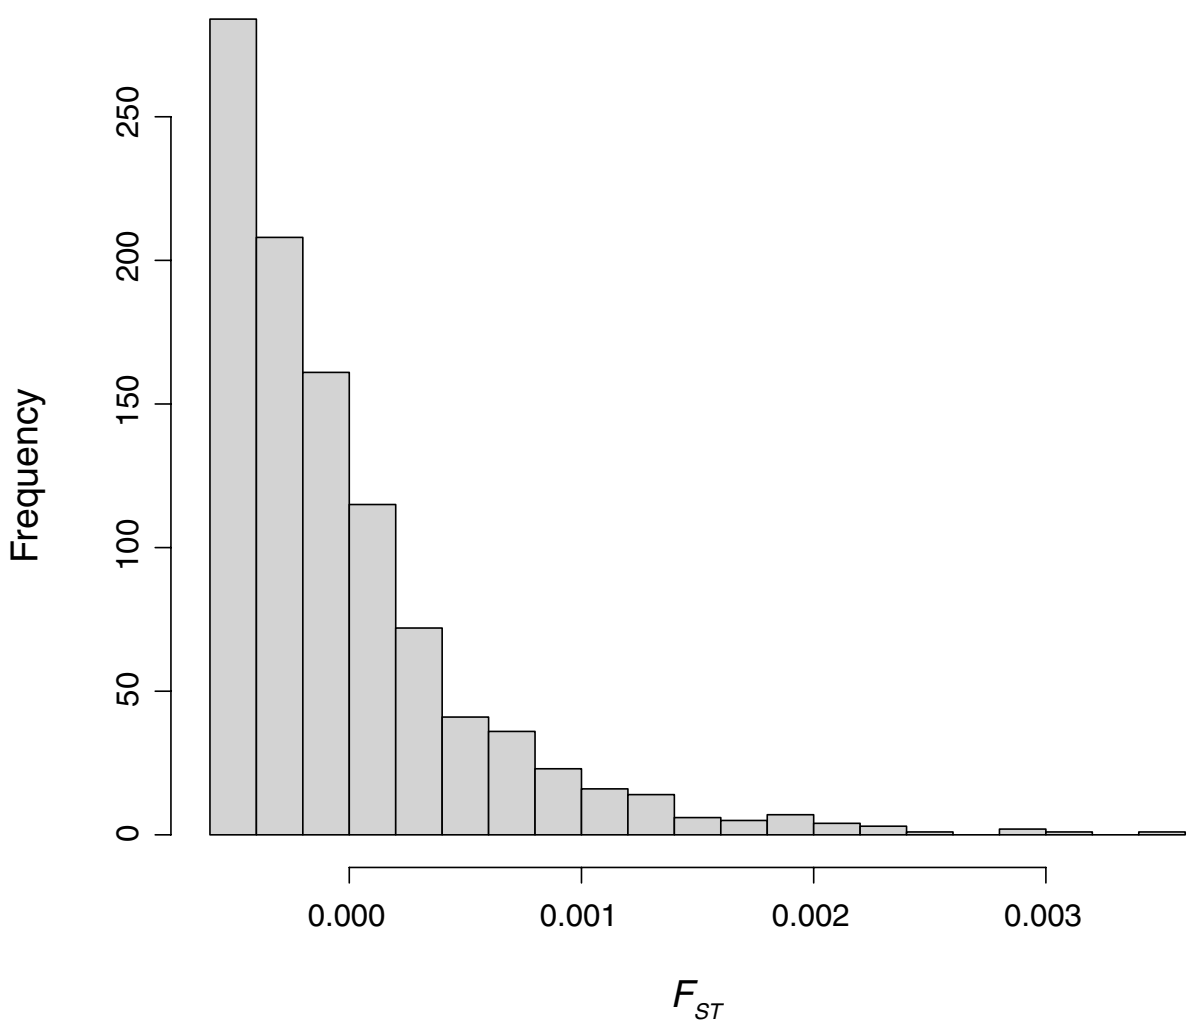

Supplement: 13059_2009_2319_MOESM7_ESM.pdf [file 13059_2009_2319_MOESM7_ESM.pdf]
